# Supplementary material for: A Legionella pneumophila Effector Protein Encoded in a Region of Genomic Plasticity Binds to Dot/Icm-Modified Vacuoles
Source: PubMed Central journal article supplement (PMC2621349; doi:10.1371/journal.ppat.1000278), 2009-01-23
Supplement: ppat.1000278.s001.pdf [file ppat.1000278.s001.pdf]

**Supporting Table S1.** Strains, plasmids and primers.

| <i>L. pneumophila</i> strains |                                                                                                                                                     |            |            |
|-------------------------------|-----------------------------------------------------------------------------------------------------------------------------------------------------|------------|------------|
| Name                          | Genotype                                                                                                                                            | Reference  |            |
| Lp01                          | <i>L. pneumophila</i> serogroup 1, strain Lp01 <i>rpsL</i>                                                                                          | [1]        |            |
| CR58                          | Lp01 <i>rpsL</i> $\Delta$ <i>dotA</i>                                                                                                               | [2]        |            |
| CR503                         | $\Delta$ <i>icmS</i> $\Delta$ <i>icmW</i> <i>rpsL</i>                                                                                               | [3]        |            |
| SN178                         | Lp01 <i>rpsL</i> $\Delta$ <i>ppeA-ppeB</i> $\Delta$ <i>pieE</i> $\Delta$ <i>pieA-pieD</i> $\Delta$ <i>lpg1975-pieG</i>                              | This study |            |
| SN179                         | Lp01 <i>rpsL</i> $\Delta$ <i>ppeA-ppeB</i> $\Delta$ <i>pieE</i> $\Delta$ <i>pieA-pieD</i> $\Delta$ <i>lpg1975-pieG</i> <i>ppgA::kan<sup>r</sup></i> | This study |            |
| SN122                         | Lp01 <i>rpsL</i> <i>pieA::kan<sup>r</sup></i>                                                                                                       | This study |            |
| Plasmids                      |                                                                                                                                                     |            |            |
| Name                          | Important properties                                                                                                                                | Marker     | Reference  |
| pCya                          | pMMB207 encoding M45-Cya                                                                                                                            | Cm         | [4]        |
| pDsRed-Express                | Prokaryotic expression vector encoding DsRed-Express                                                                                                | Amp        | Clontech   |
| pEGFP-C1                      | Eukaryotic expression vector encoding EGFP                                                                                                          | Kan        | Clontech   |
| pEGFP-C2                      | Eukaryotic expression vector encoding EGFP                                                                                                          | Kan        | Clontech   |
| pEGFP-C3                      | Eukaryotic expression vector encoding EGFP                                                                                                          | Kan        | Clontech   |
| pEMC22                        | pMMB207 encoding DsRed-Express                                                                                                                      | Cm         | This study |
| pET15b                        | 6His-tag expression vector                                                                                                                          | Amp        | Novagen    |
| pMMB207                       | cloning vector derived from RSF1010                                                                                                                 | Cm         | [5]        |
| pSN20                         | pCya encoding the Cya-PieC fusion protein                                                                                                           | Cm         | This study |
| pSN24                         | pCya encoding the Cya-PieA fusion protein                                                                                                           | Cm         | This study |
| pSN25                         | pCya encoding the Cya-PieE fusion protein                                                                                                           | Cm         | This study |
| pSN27                         | pCya encoding the Cya-PieD fusion protein                                                                                                           | Cm         | This study |
| pSN28                         | pCya encoding the Cya-PieG fusion protein                                                                                                           | Cm         | This study |
| pSN30                         | pEGFP encoding the GFP-PieC fusion protein                                                                                                          | Kan        | This study |
| pSN33                         | pEGFP encoding the GFP-PieG fusion protein                                                                                                          | Kan        | This study |
| pSN35                         | pEGFP encoding the GFP-PieD fusion protein                                                                                                          | Kan        | This study |
| pSN37                         | pEGFP encoding the GFP-PieE fusion protein                                                                                                          | Kan        | This study |
| pSN39                         | pEGFP encoding the GFP-PieA fusion protein                                                                                                          | Kan        | This study |
| pSN45                         | pSR47 for insertional inactivation of <i>pieA</i>                                                                                                   | Kan        | This study |
| pSN53                         | pSR47s for <i>ppeA-ppeB</i> deletion                                                                                                                | Kan        | This study |
| pSN54                         | pEGFP encoding the GFP-PieA(1-614) fusion protein                                                                                                   | Kan        | This study |
| pSN55                         | pEGFP encoding the GFP-PieA(1-512) fusion protein                                                                                                   | Kan        | This study |
| pSN56                         | pEGFP encoding the GFP-PieA(1-323) fusion protein                                                                                                   | Kan        | This study |
| pSN59                         | pEGFP encoding the GFP-PieA(324-699) fusion protein                                                                                                 | Kan        | This study |
| pSN60                         | pEGFP encoding the GFP-PieA(513-699) fusion protein                                                                                                 | Kan        | This study |
| pSN61                         | pEGFP encoding the GFP-PieA(615-699) fusion protein                                                                                                 | Kan        | This study |
| pSN63                         | pET15b encoding 6His-PieA                                                                                                                           | Amp        | This study |
| pSN64                         | pSR47s for <i>lpg1975-pieG</i> deletion                                                                                                             | Kan        | This study |
| pSN65                         | pCya encoding the Cya-PieB fusion protein                                                                                                           | Cm         | This study |
| pSN66                         | pCya encoding the Cya-lpg1968 fusion protein                                                                                                        | Cm         | This study |
| pSN67                         | pCya encoding the Cya-lpg1975 fusion protein                                                                                                        | Cm         | This study |
| pSN69                         | pEGFP encoding the GFP-PieB fusion protein                                                                                                          | Kan        | This study |
| pSN69                         | pSR47 for insertional inactivation of <i>ppgA</i>                                                                                                   | Kan        | This study |
| pSN71                         | pSR47s for <i>pieE</i> deletion                                                                                                                     | Kan        | This study |
| pSN72                         | pSR47s for <i>pieA-pieD</i> deletion                                                                                                                | Kan        | This study |
| pSN73                         | pET15b encoding 6His-PieA(513-699)                                                                                                                  | Amp        | This study |
| pSN81                         | pCya encoding the Cya-PpeA fusion protein                                                                                                           | Cm         | This study |
| pSN82                         | pCya encoding the Cya-PpeB fusion protein                                                                                                           | Cm         | This study |
| pSN83                         | pCya encoding the Cya-PpgA fusion protein                                                                                                           | Cm         | This study |
| pSN87                         | pCya encoding the Cya-PieF fusion protein                                                                                                           | Cm         | This study |
| pSN88                         | pCya encoding the Cya-lpg1973 fusion protein                                                                                                        | Cm         | This study |
| pSR47                         | Suicide vector                                                                                                                                      | Kan        | [6]        |
| pSR47s                        | Gene replacement vector                                                                                                                             | Kan        | [6]        |

| Primers      |                                                          |                       |
|--------------|----------------------------------------------------------|-----------------------|
| Name         | Sequence                                                 | Restriction site used |
| DsRed T1 Fwd | CG GAT CCC AGG AGT GGT AAT AAT GGC CTC CTC CGA GGA CGT C | BamHI                 |
| DsRed T1 Rev | GGG AAG CTT CTA CAG GAA CAG GTG GTG GCG G                | HindIII               |
| SN34         | CGAGATCTTTATGCTGAAATTTTACTCAGA                           | BglIII                |
| SN35         | GCGCTGCAGTTATTTATCTCTGGAGTGA                             | PstI                  |
| SN44         | GCGGAATCCGGATCCTTATGATAAAGGACATTCTC                      | BamHI                 |
| SN45         | CGCCTCGAGCTGCAGTTAGTTTCTGAAAACCC                         | PstI                  |
| SN46         | GCGGAATCCGGATCCTTATGAAAACAGTAAAACAA                      | BamHI                 |
| SN47         | CGCCTCGAGCTGCAGTCATAACAAATTGCATGG                        | PstI                  |
| SN48         | GCGGAATCCGGATCCTTATGGAGTCTGTATTTTCA                      | BamHI                 |
| SN49         | CGCCAATTCTGCAGTTAGTAGCCGTAATTTAC                         | PstI                  |
| SN50         | GCGCTCGAGTGGATCCTTATGCAAGAAAAAATTATC                     | BamHI                 |
| SN51         | CGCCTCGAGCTGCAGCTAGATATTCGTAATTCC                        | PstI                  |
| SN72         | GCGCTGCAGACGGTCAATTAGGCTGTGG                             | PstI                  |
| SN73         | CGCGGTACCATTTCATTCCGGTGAATGTT                            |                       |
| SN74         | GCGCTGCAGACTAATTTATACAATGCTGT                            | PstI                  |
| SN75         | GCGGTACCATAATGCGAGATTTCAATA                              | KpnI                  |
| SN76         | CGCTCTAGAAATGGCTTCCAATGACGCG                             | XbaI                  |
| SN77         | ACGGCTGGATTTGGCCAAAACATAATCAC                            |                       |
| SN78         | TTTTGGCCAAATCCAGCCGTCGGCATTAA                            |                       |
| SN79         | CCGCGGCCGCGTTAGTACAACAGGGGATT                            | NotI                  |
| SN91         | GCGGGATCCCTAGATATTCGTAATTCC                              | BamHI                 |
| SN99         | GCGCATATGCAAGAAAAAATTATC                                 | NdeI                  |
| SN129        | GCGGCGGCCGCATGCTCCGCAACTGCTAAT                           | NotI                  |
| SN133        | GCGGCGGCCGCCTGAACCTGGGCAATTTGTT                          | NotI                  |
| SN134        | AACAAATTGCAACCCACGATCTTTGGAATG                           |                       |
| SN135        | ATCGTGGGTTGCAATTTGTTATGAGGTTAATTGG                       |                       |
| SN136        | GCGGAGCTCACAAACACCATCCATCCCTGT                           | SacI                  |
| SN141        | GCGAGATCTTTATGAAAATTTACAGTATAGTTAATC                     | BglIII                |
| SN142        | GCGCTGCAGTTAGGTAAAAGTATAGGATAAATC                        | PstI                  |
| SN143        | GCGAGATCTTTATGGGGAAATTTTATATGAGTAAA                      | BglIII                |
| SN144        | GCGCTGCAGTCATATGTTGGTTATCACTTTCA                         | PstI                  |
| SN145        | GCGAGATCTTTGTGGTTATAATGAAACCATCT                         | BglIII                |
| SN146        | GCGCTGCAGTTATTTGATGCAATTCAAGATGC                         | PstI                  |
| SN147        | GCGCATATGAATTCACCACAGAGAATAG                             | NdeI                  |
| SN148        | GCGGGATCCTAGATATTCGTAATTCCTTTTC                          | BamHI                 |
| SN149        | ATTCCTTTTCTTGAGAATGTCCTTTATCATTTA                        |                       |
| SN150        | ACATTCTCAAGAAAAGGAATTACGAATATCTAG                        |                       |
| SN151        | GCGTCTAGATGAAACTCTCGCATAACAATTC                          | XbaI                  |
| SN152        | GCGGCGGCCGCCTAATGGAAAGTGTGCTATT                          | NotI                  |
| SN153        | TTTACTCTTTCCCTGAAAATACAGACTCCAT                          |                       |
| SN154        | ATTTTCAGGGAAAAGAGTAAATTACGGCTACTAA                       |                       |
| SN155        | CGCTCTAGATTGTTGATAAAACTGAGCCGCA                          | XbaI                  |
| SN166        | CGCGGATCCTTATGATTATGTTTTGGCCAACTGCA                      | BamHI                 |
| SN167        | GTGCTGCAGTTACGCTATCTCATTAAGTGT                           | PstI                  |
| SN168        | GCCGGATCCTTATGTCACTTGCTACTTATGATG                        | BamHI                 |
| SN169        | GTGCTGCAGTTAATGCCGGACGGCTGG                              | PstI                  |
| SN170        | GTGGGATCCATGAAAGAACCTCGTGAACCT                           | BamHI                 |
| SN171        | GTGCTGCAGTTAGGCGCTTCGTTTGGG                              | PstI                  |
| SN175        | GTGGGATCCTTATGAAAAGACTAATTATCTGTAA                       | BamHI                 |
| SN176        | GTGCTGCAGTCAAATTTGTTTATTAAGTTATATG                       | PstI                  |
| SN177        | CGCGGATCCTTATGACTAACAAAATCTTAAC                          | BamHI                 |
| SN178        | GTGCTGCAGTGTGTTTTGTTTTTCTTAAT                            | PstI                  |

## References

- Berger KH, Isberg RR (1993) Two distinct defects in intracellular growth complemented by a single genetic locus in *Legionella pneumophila*. Mol Microbiol 7: 7-19.

2. Zuckman DM, Hung JB, Roy CR (1999) Pore-forming activity is not sufficient for *Legionella pneumophila* phagosome trafficking and intracellular growth. Mol Microbiol 32: 990-1001.
3. Coers J, Kagan JC, Matthews M, Nagai H, Zuckman DM, et al. (2000) Identification of lcm protein complexes that play distinct roles in the biogenesis of an organelle permissive for *Legionella pneumophila* intracellular growth. Mol Microbiol. pp. 719-736.
4. Nagai H, Cambronne ED, Kagan JC, Amor JC, Kahn RA, et al. (2005) A C-terminal translocation signal required for Dot/lcm-dependent delivery of the *Legionella* RaIF protein to host cells. Proc Natl Acad Sci U S A 102: 826-831.
5. Morales VM, Backman A, Bagdasarian M (1991) A series of wide-host-range low-copy-number vectors that allow direct screening for recombinants. Gene 97: 39-47.
6. Merriam JJ, Mathur R, Maxfield-Boumil R, Isberg RR (1997) Analysis of the *Legionella pneumophila* *fliI* gene: intracellular growth of a defined mutant defective for flagellum biosynthesis. Infect Immun 65: 2497-2501.
